# Supplementary figures and images for: Lactate-upregulated NADPH-dependent NOX4 expression via HCAR1/PI3K pathway contributes to ROS-induced osteoarthritis chondrocyte damage
Source: PubMed Central journal article supplement — Redox Biol. 2023 Sep 4;67:102867. doi: 10.1016/j.redox.2023.102867 (PMC10498433; doi:10.1016/j.redox.2023.102867), 2023-09-04

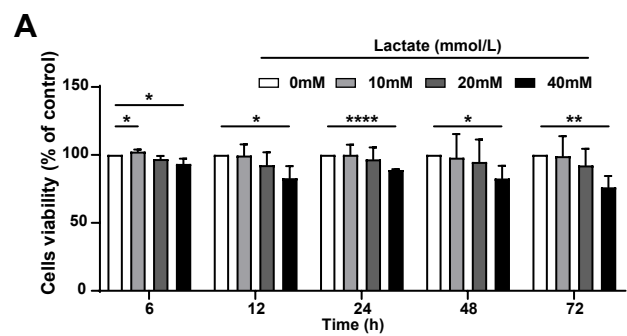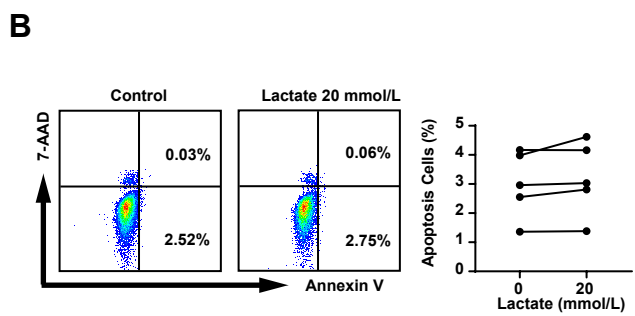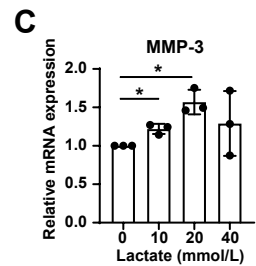

Supplement: mmc3.pdf [file mmc3.pdf]

**A**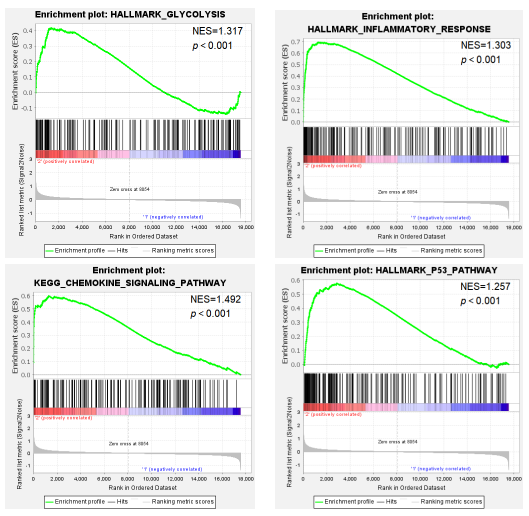**B**

### Catabolic and anabolic genes for "GSE104793"

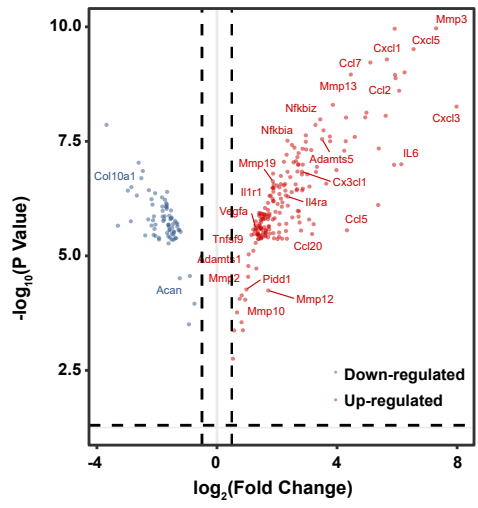

Supplement: mmc4.pdf [file mmc4.pdf]

**A**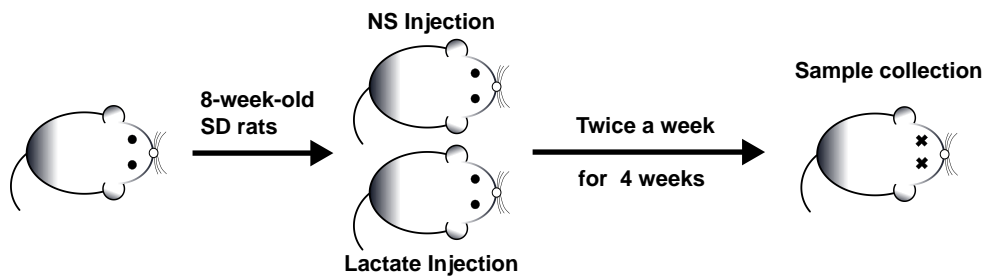**B**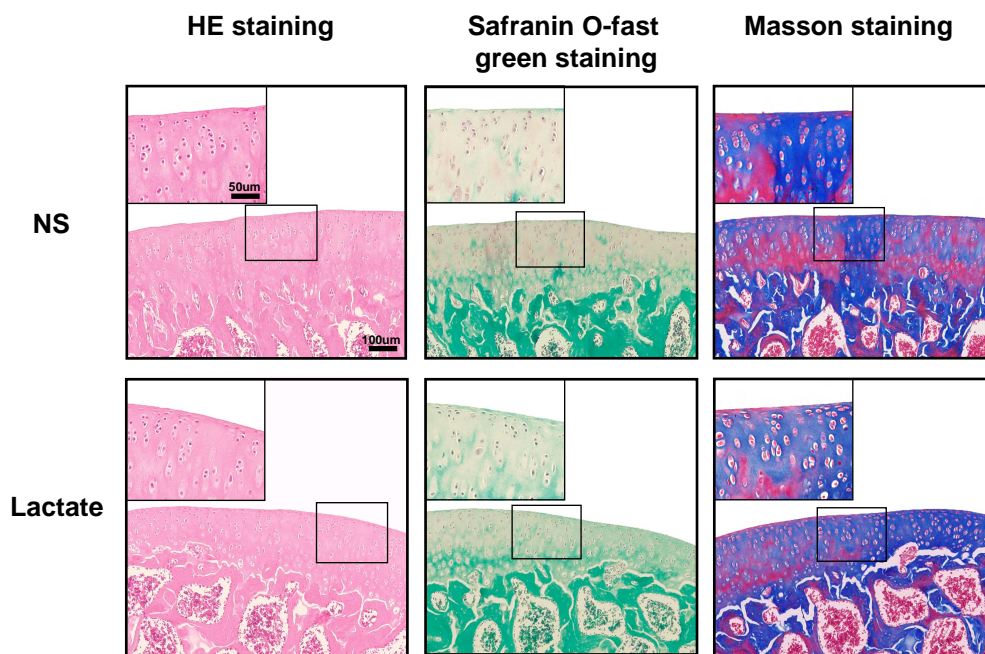

Supplement: mmc6.pdf [file mmc6.pdf]
